# Supplementary material for: Chemical potentials of electric double layers at metal–electrolyte interfaces: dependence on electrolyte concentration and electrode materials, and application to field-effect transistors
Source: Royal Society of Chemistry journal article supplement (doi:10.1039/d0cp00423e), 2020-01-01
Supplement: d0cp00423e1.pdf [file d0cp00423e1.pdf]

## Supporting Information

# Chemical Potentials of Electric Double Layers at Metal-Electrolyte Interfaces: Dependence on Electrolyte Concentration and Electrode Materials, and Application to Field-Effect Transistors

Chihiro Nanjo,<sup>a</sup> Daisuke Yokogawa,<sup>b</sup> Michio M. Matsushita<sup>a</sup> and Kunio Awaga<sup>\*a</sup>

<sup>a</sup>Department of Chemistry & Integrated Research Consortium on Chemical Sciences (IRCCS), Nagoya University, Furo-cho, Chikusa-ku, Nagoya 464-8602, Japan

<sup>b</sup>Graduate School of Arts and Science, The University of Tokyo, 3-8-1 Komaba, Meguro-ku, Tokyo, 153-8902, Japan

(a)

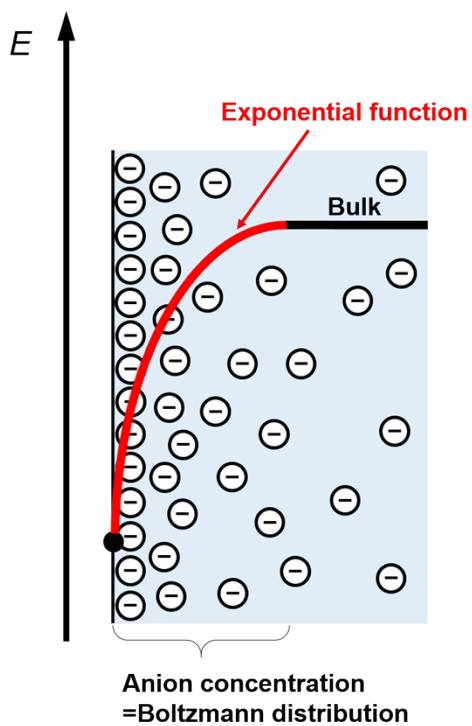

(b)

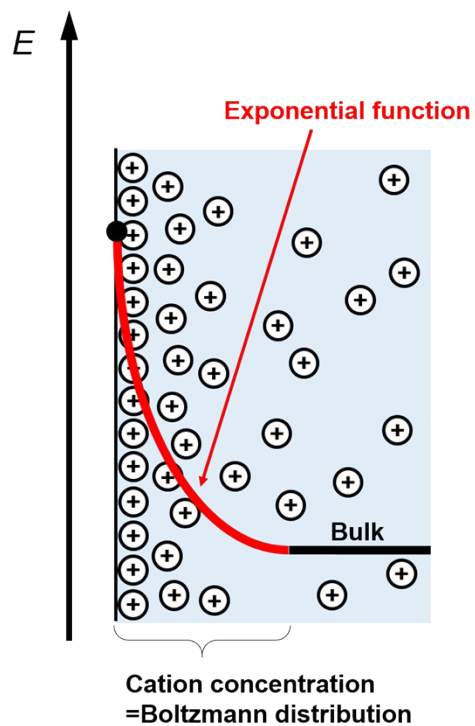

**Scheme S1** The Gouy-Chapman model: the concentration distribution of ions follows the Boltzmann distribution, and the potential follows the exponential function. Panels (a) and (b) show the cases of anions and cations, respectively.

### Conversion of $V_{MR}$ to $E_M$

The potential energies of metal electrodes  $E_M$  were obtained, using the following equation:

$$E_M = -eV_{MR} + E_R, \quad (S1)$$

which was from eq. (1). Since the potential energy of SHE was reported as  $-4.44 \text{ eV}$ ,<sup>1</sup> and that of the present Ag/AgCl reference electrode was  $-0.195 \text{ eV}$  (vs. SHE at 298 K),  $E_R$  of this reference electrode was calculated as  $-4.64 \text{ eV}$ .

### Derivation of eq. (7)

Using the Gouy-Chapman model, the relation between the surface charge  $q$  and the electric potential  $\psi$  on the surface of metal electrode is expressed as

$$q = \text{sgn}(\psi) \sqrt{\epsilon_0 \epsilon_s k_B T (z^+ - z^-) c_0} \sqrt{2 \left( \frac{z^+ \exp\left(\frac{-z^- F \psi}{RT}\right) - z^- \exp\left(\frac{-z^+ F \psi}{RT}\right)}{z^+ - z^-} - 1 \right)}, \quad (\text{S2})$$

where  $\epsilon_0$  and  $\epsilon_s$  are the electrical permittivity of vacuum and the dielectric constant of the solution without the electrolyte, respectively,  $k_B$  is the Boltzmann constant,  $z^+$  and  $z^-$  are the valences of the cation and anion, respectively, and  $c_0$  is the bulk concentration of the salt.<sup>65</sup> The bulk concentrations of the cation and anion are expressed as  $-z^- c_0$  and  $z^+ c_0$ , respectively. The dimensionless surface charge density in EDL is defined as

$$\sigma_D = -\text{sgn}(\psi) \sqrt{\frac{z^+ - z^-}{2z^+(-z^-)}} \sqrt{2 \left( \frac{z^+ \exp\left(\frac{-z^- F \psi}{RT}\right) - z^- \exp\left(\frac{-z^+ F \psi}{RT}\right)}{z^+ - z^-} \right)}, \quad (\text{S3})$$

by dividing the left and right of eq. (S2) by  $\sqrt{\epsilon_0 \epsilon_s k_B T z^+ (-z^-) c_0}$ .

Equation (S3) is approximated as

$$\sigma_D \sim \begin{cases} -\sqrt{\frac{1}{-z^-}} \exp\left(\frac{-z^- F \psi}{2RT}\right) & \psi \gg 0 \\ \sqrt{\frac{1}{z^+}} \exp\left(\frac{-z^+ F \psi}{2RT}\right) & \psi \ll 0 \end{cases}. \quad (\text{S4})$$

Equation (S4) is rewritten as

$$\psi \sim \begin{cases} -\frac{2RT}{z^- F} \ln(-\sqrt{-z^-} \sigma_D) & \sigma_D \ll 0 \\ -\frac{2RT}{z^+ F} \ln(\sqrt{z^+} \sigma_D) & \sigma_D \gg 0 \end{cases} . \quad (S5)$$

Using the charge of the ionic species  $z$  ( $z = z^+$  or  $z^-$ ), eq. (7) is derived as

$$\psi \sim -\frac{2RT}{zF} \ln(\sqrt{|z|} |\sigma_D|) . \quad (7)$$

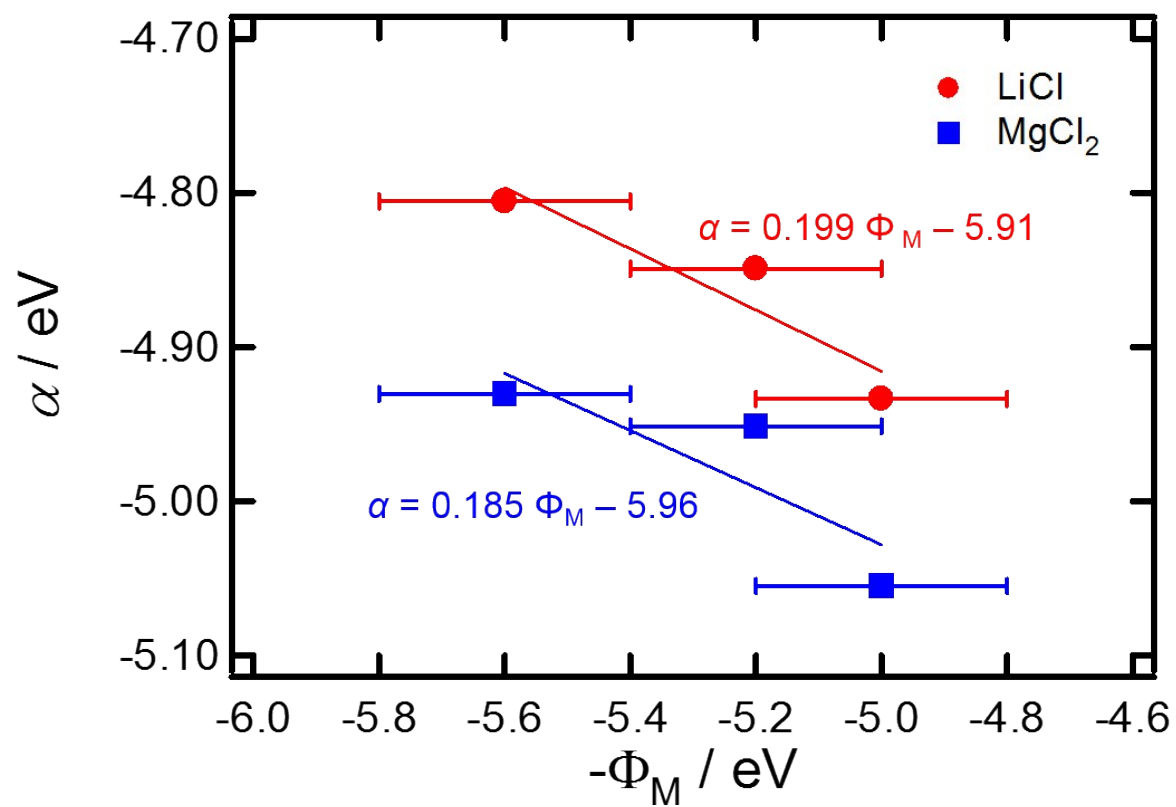

**Figure S1** Work function dependence of the fitting parameter  $\alpha$  in Table 1 for the PEG solutions of LiCl and MgCl<sub>2</sub>.

### Relation between $\ln \kappa$ and $\Phi_M$

As shown in Fig. S1, the values of  $\alpha$  are approximately proportional to  $\Phi_M$ , and, as shown in eq. (10),  $\alpha$  is also proportional to  $\ln \kappa$ . Therefore, we can expect a linear relation between  $\Phi_M$  and  $\ln \kappa$ , namely

$$\ln \kappa \propto -\Phi_M. \quad (S6)$$

Since the proportionality coefficients between  $\alpha$  and  $\Phi_M$  for the LiCl and MgCl<sub>2</sub> solutions in Fig. S1, are nearly the same, the proportionality coefficients between  $\Phi_M$  and  $\ln \kappa$  would depend little on the electrolytes.

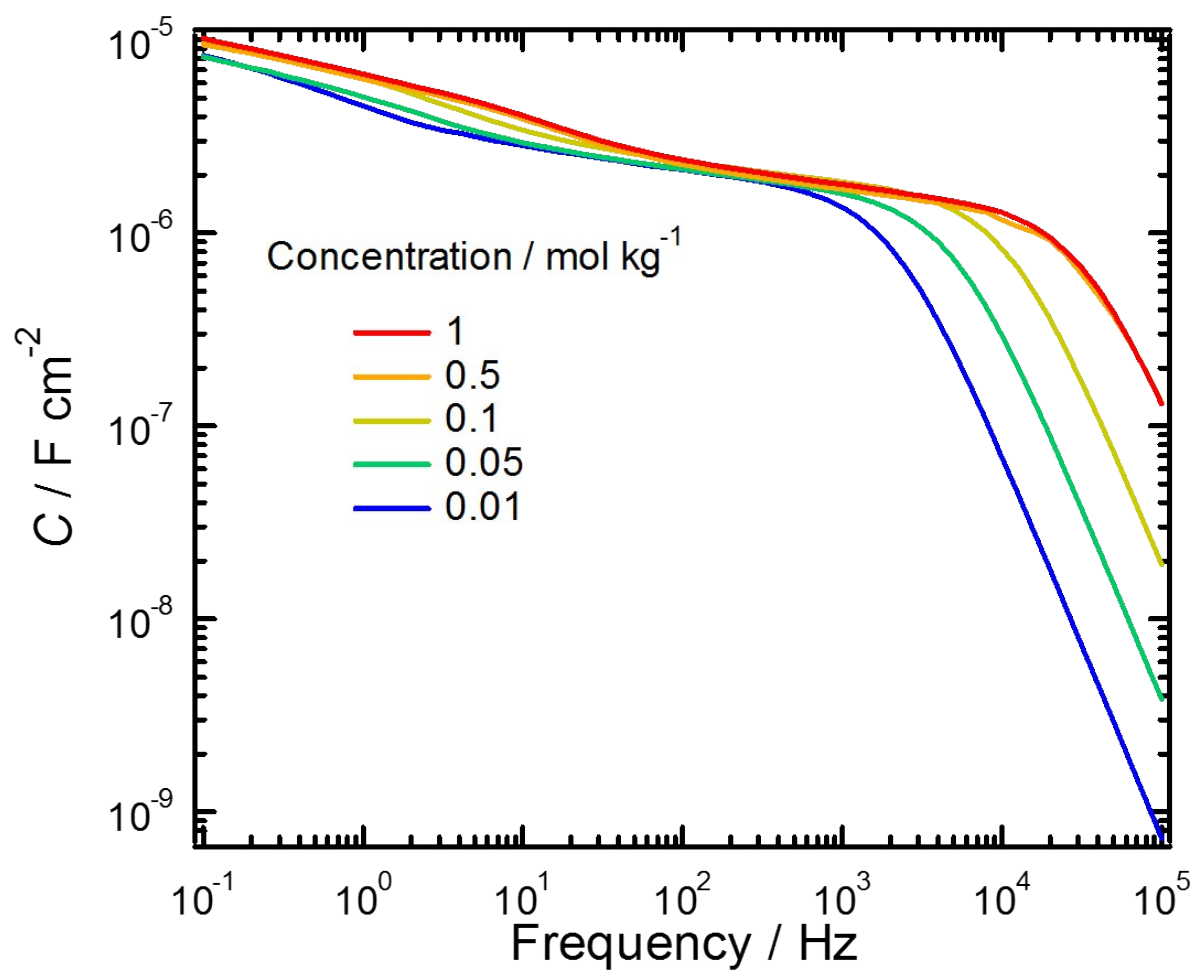

**Figure S2** Frequency dependence of the capacitance for the LiCl-PEG solutions.



**Table S1** Concentration dependence of the capacitance at 0.1 Hz for the LiCl-PEG solutions, and the FET parameters for the PtPc EDL-FETs of the LiCl-PEG solutions.

| Concentration          | Capacitance            | Mobility                                        | Threshold voltage | on/off ratio      |
|------------------------|------------------------|-------------------------------------------------|-------------------|-------------------|
| / mol kg <sup>-1</sup> | $C / \text{F cm}^{-2}$ | $\mu / \text{cm}^2 \text{V}^{-1} \text{s}^{-1}$ | $V_T / \text{V}$  |                   |
| 0.01                   | $8.3 \times 10^{-6}$   | $1.2 \times 10^{-3}$                            | -0.8              | $1.4 \times 10^3$ |
| 0.05                   | $8.2 \times 10^{-6}$   | $2.5 \times 10^{-3}$                            | -0.74             | $2.8 \times 10^3$ |
| 0.1                    | $9.6 \times 10^{-6}$   | $2.0 \times 10^{-3}$                            | -0.66             | $3.0 \times 10^3$ |
| 0.5                    | $9.5 \times 10^{-6}$   | $2.7 \times 10^{-3}$                            | -0.65             | $5.2 \times 10^3$ |
| 1                      | $1.0 \times 10^{-5}$   | $2.5 \times 10^{-3}$                            | -0.62             | $3.4 \times 10^3$ |

#### Calculations for mobilities, threshold voltages and on/off ratios

The transistor performances shown in Table S1 was calculated by the following procedure. The mobilities  $\mu$  were calculated by the equation  $\mu = (\partial I_D / \partial V_G) (L / w C V_D)$ , where  $L$ ,  $w$ ,  $C$  were channel length ( $1.0 \times 10^{-3}$  cm), channel width (20 cm), and capacitance of the gate-dielectrics. The values of  $\partial I_D / \partial V_G$  were obtained from the slope of the linear region of the transfer characteristics. The threshold voltages  $V_T$  were obtained from the  $|I_D|^{1/2}$  vs.  $V_G$  plots. The on/off ratios were obtained from the ratio of the maximum and minimum values of  $I_D$  in the transfer characteristics.

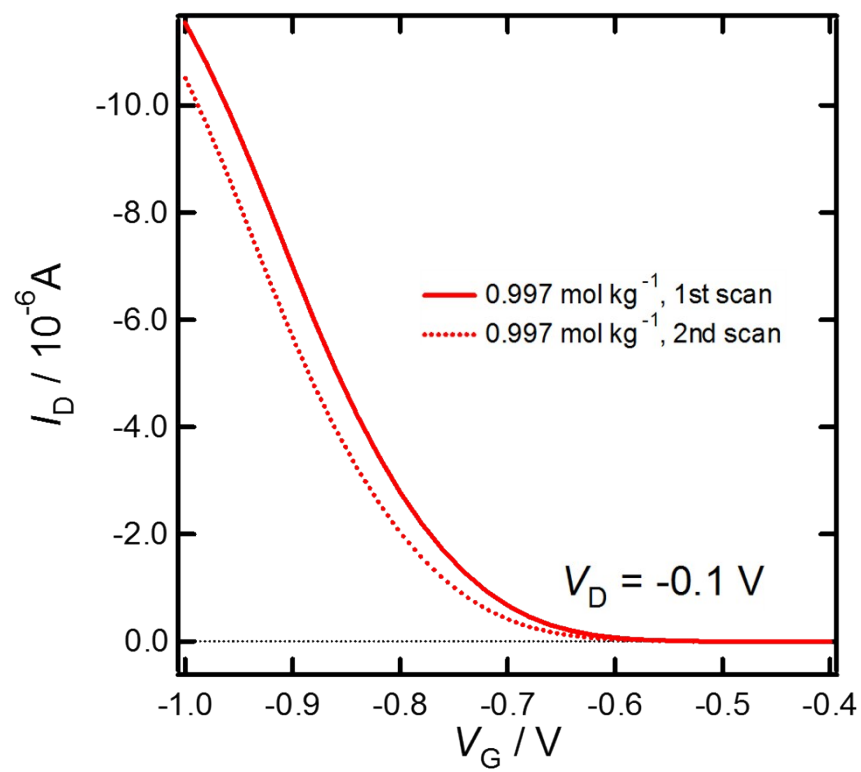

**Figure S3** Comparison between the 1<sup>st</sup> and 2<sup>nd</sup> scans for the transfer characteristics of the PtPc EDL-FET with the LiCl-PEG solutions of  $0.997 \text{ mol kg}^{-1}$ .

## References

- 1 S. Trasatti, *Pure & Appl Chem.*, 1986, **58**, 955.
